# Supplementary material for: A targetable CoQ-FSP1 axis drives ferroptosis- and radiation-resistance in KEAP1 inactive lung cancers
Source: Nat Commun. 2022 Apr 22;13:2206. doi: 10.1038/s41467-022-29905-1 (PMC9033817; doi:10.1038/s41467-022-29905-1)
Supplement: Supplementary file 1 — Supplementary Information [file 41467_2022_29905_MOESM1_ESM.pdf]

## **Supplementary Information**

**A targetable CoQ-FSP1 axis drives ferroptosis- and radiation-resistance in KEAP1 inactive lung cancers**

**Pranavi Koppula, Guang Lei, Yilei Zhang, Yuelong Yan, Chao Mao, Lavanya Kondiparthi, Jiejun Shi, Xiaoguang Liu, Amber Horbath, Molina Das, Wei Li, Masha V. Poyurovsky, Kellen Olszewski, Boyi Gan**

Supplementary Figure 1

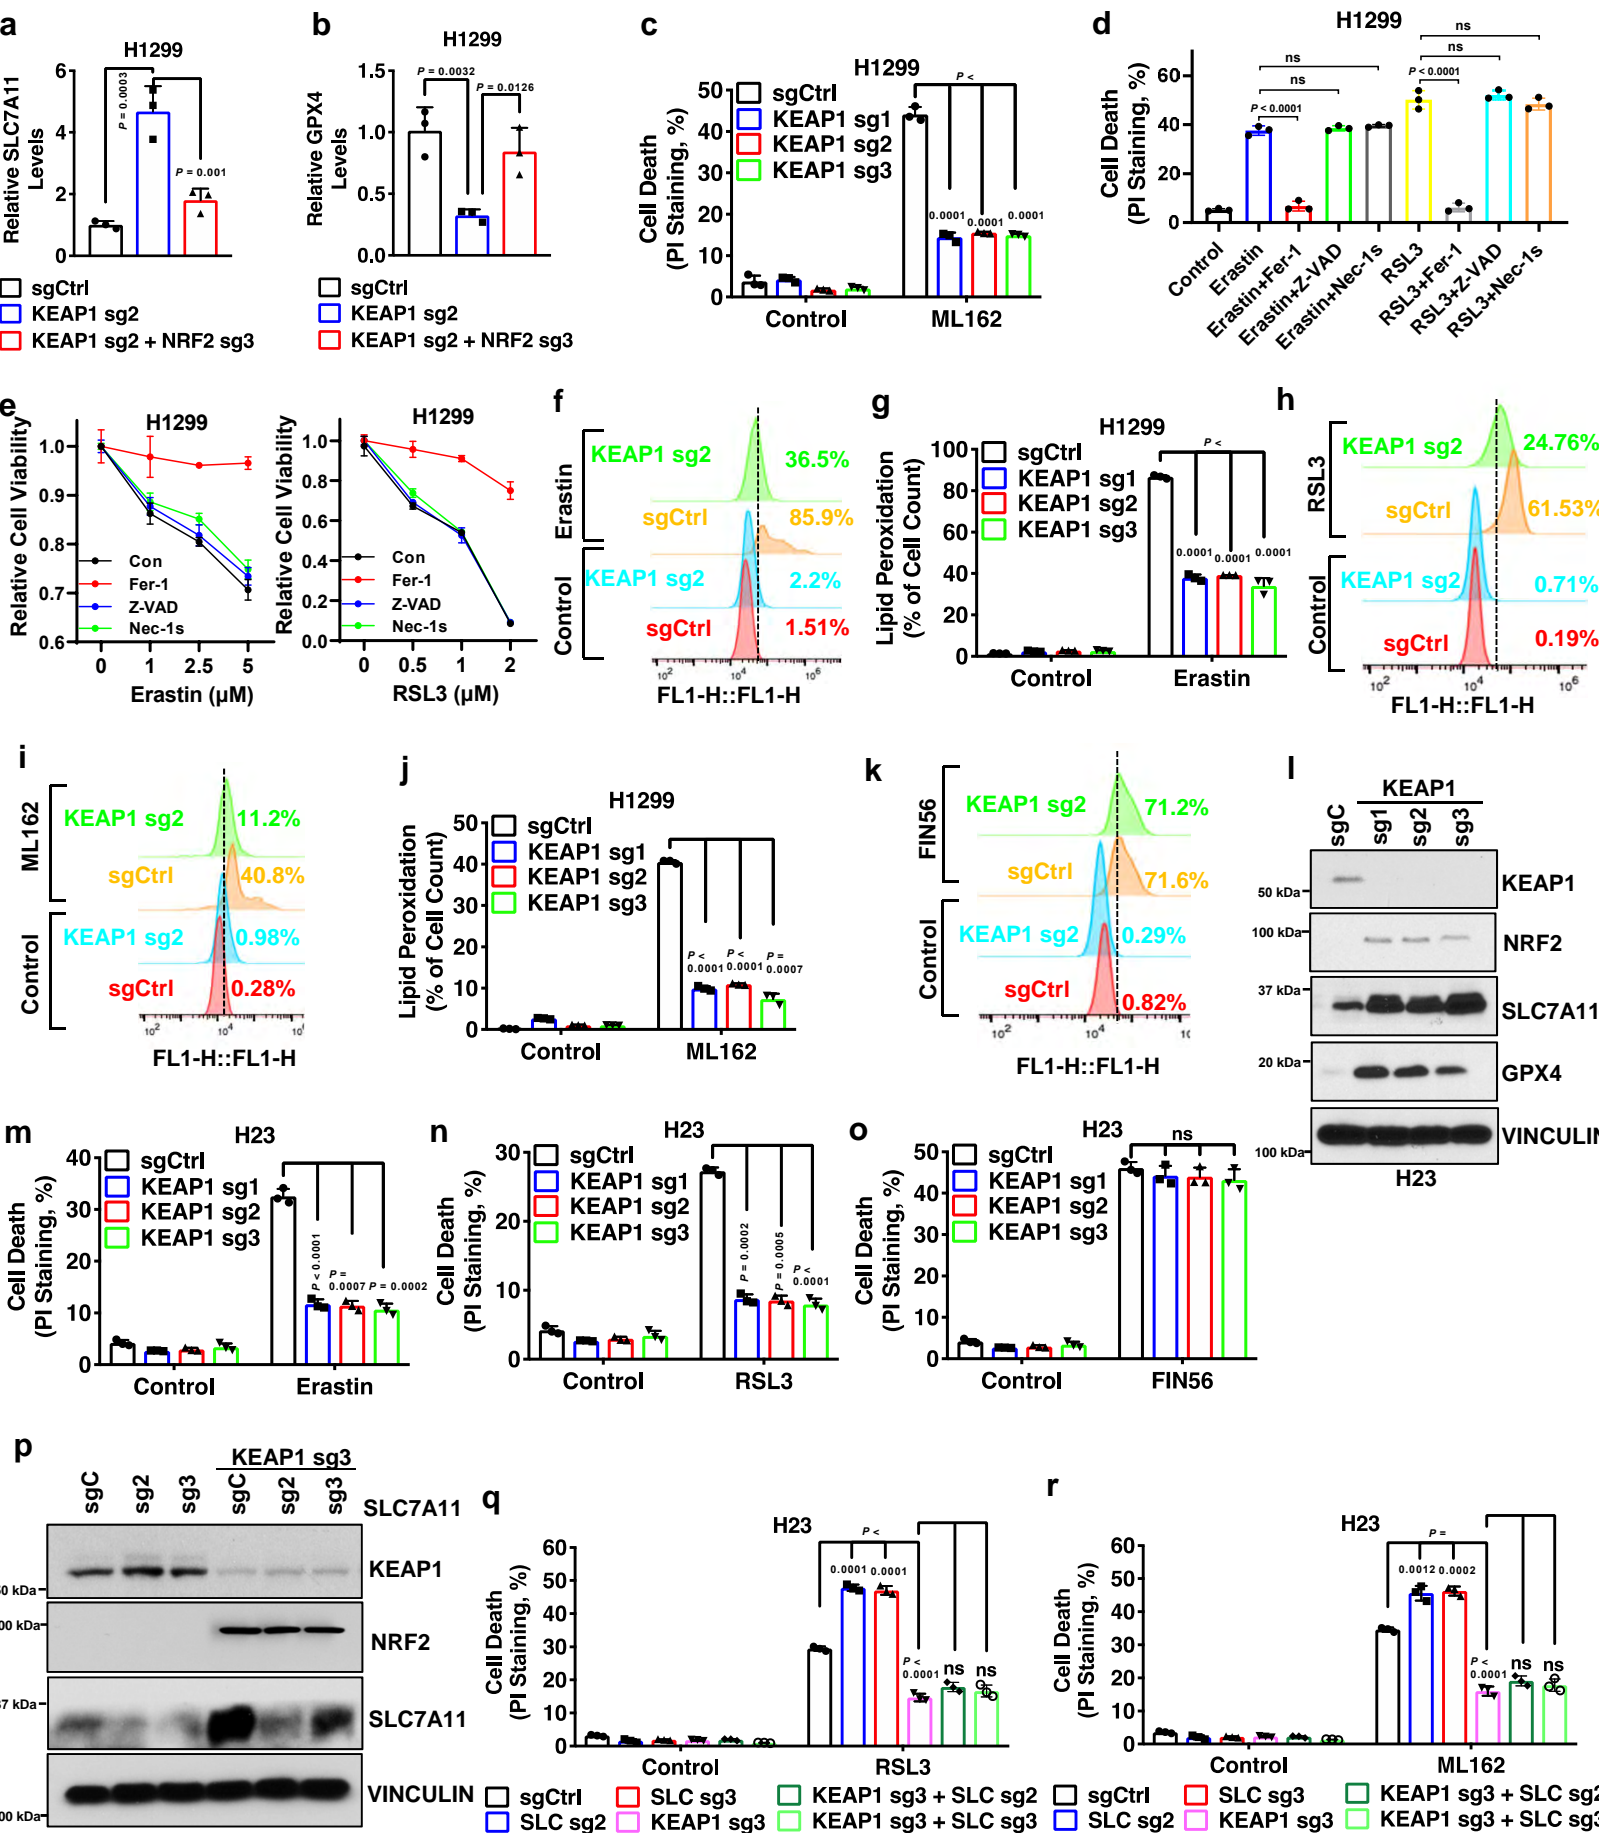

**Supplementary Figure 1. KEAP1 regulates ferroptosis in a SLC7A11-independent manner in lung cancer cells.**

**a, b** qRT-PCR analysis of *SLC7A11* (**a**) and *GPX4* (**b**) in *KEAP1/NRF2* DKO H1299 cells. **c** Cell death upon ML162 treatment in *KEAP1* KO H1299 cells was analyzed by PI staining. **d, e** Cell death (**d**) and cell viability (**e**) measurement in *KEAP1* KO H1299 cells with indicated treatments. **f-k** Lipid peroxidation levels were determined for *KEAP1* KO H1299 cells treated with erastin (**f, g**), RSL3 (**h**), ML162, (**i, j**) and FIN56 (**k**). **l** Protein levels of KEAP1, NRF2, SLC7A11, GPX4 in *KEAP1* KO H23 cells were determined by western blotting. **m-o** Cell death upon erastin (**m**), RSL3 (**n**), or FIN56 (**o**) treatment in *KEAP1* KO H23 cells was analyzed by PI staining. **p** Protein levels of KEAP1, NRF2, SLC7A11 in *SLC7A11* KO, *KEAP1* KO and *SLC7A11/KEAP1* DKO H23 cells. **q, r** Cell death was quantified by PI staining for H23 cells by RSL3 (**q**) or ML162 (**r**). Error bars are (if mentioned otherwise) mean  $\pm$  SD;  $n = 3$ . P value was determined by two-tailed unpaired Student's t test (1a, b, d) and 2-way ANOVA (1c, 1g, 1j, 1m-o, 1q-r); ns, not significant. Source data are provided as a Source Data file.

Supplementary Figure 2

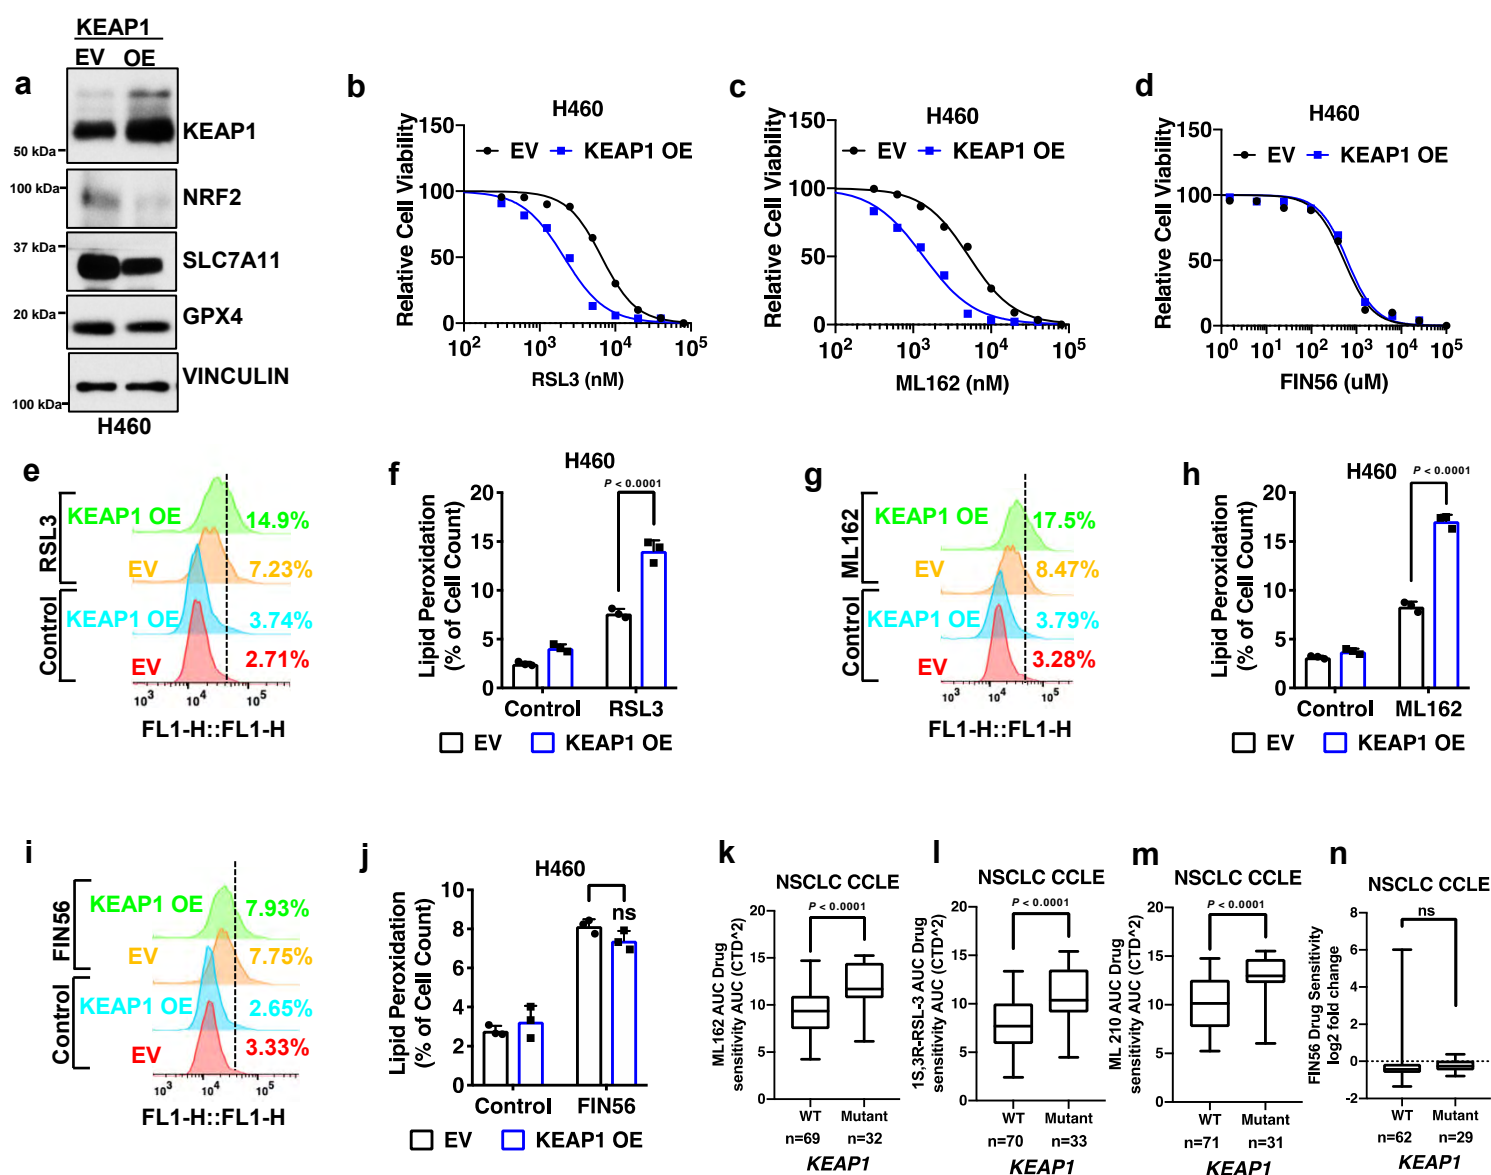

Supplementary Figure 2. KEAP1 regulates ferroptosis in lung cancer cells.

**a** Protein levels of KEAP1, NRF2, SLC7A11, GPX4 in H460 cells with KEAP1 overexpression (OE). **b-d** Cell viability was quantified by CCK8 for H460 cells by RSL3 (**b**), ML162 (**c**) and FIN56 (**d**). **e-j** Lipid peroxidation levels were determined for KEAP1 OE H460 cells treated with RSL3 (**e**, **f**), ML162 (**g**, **h**), or FIN56 (**i**, **j**). **k-n** *KEAP1* mutation correlates with resistance to ML162 (**k**), RSL3 (**l**), and ML210 (**m**), but not FIN56 (**n**). NSCLC: Non-Small Cell Lung Cancer; CCLE: Cancer Cell Line Encyclopedia. Error bars are (if mentioned otherwise) mean  $\pm$  SD;  $n = 3$ . P value was determined by two-tailed unpaired Student's t test. Box and whisker plots show centre line at median, box limits at 25th/75th centiles and whiskers  $\pm 1.5 \times$  interquartile range (IQR); ns, not significant. Source data are provided as a Source Data file.

Supplementary Figure 3

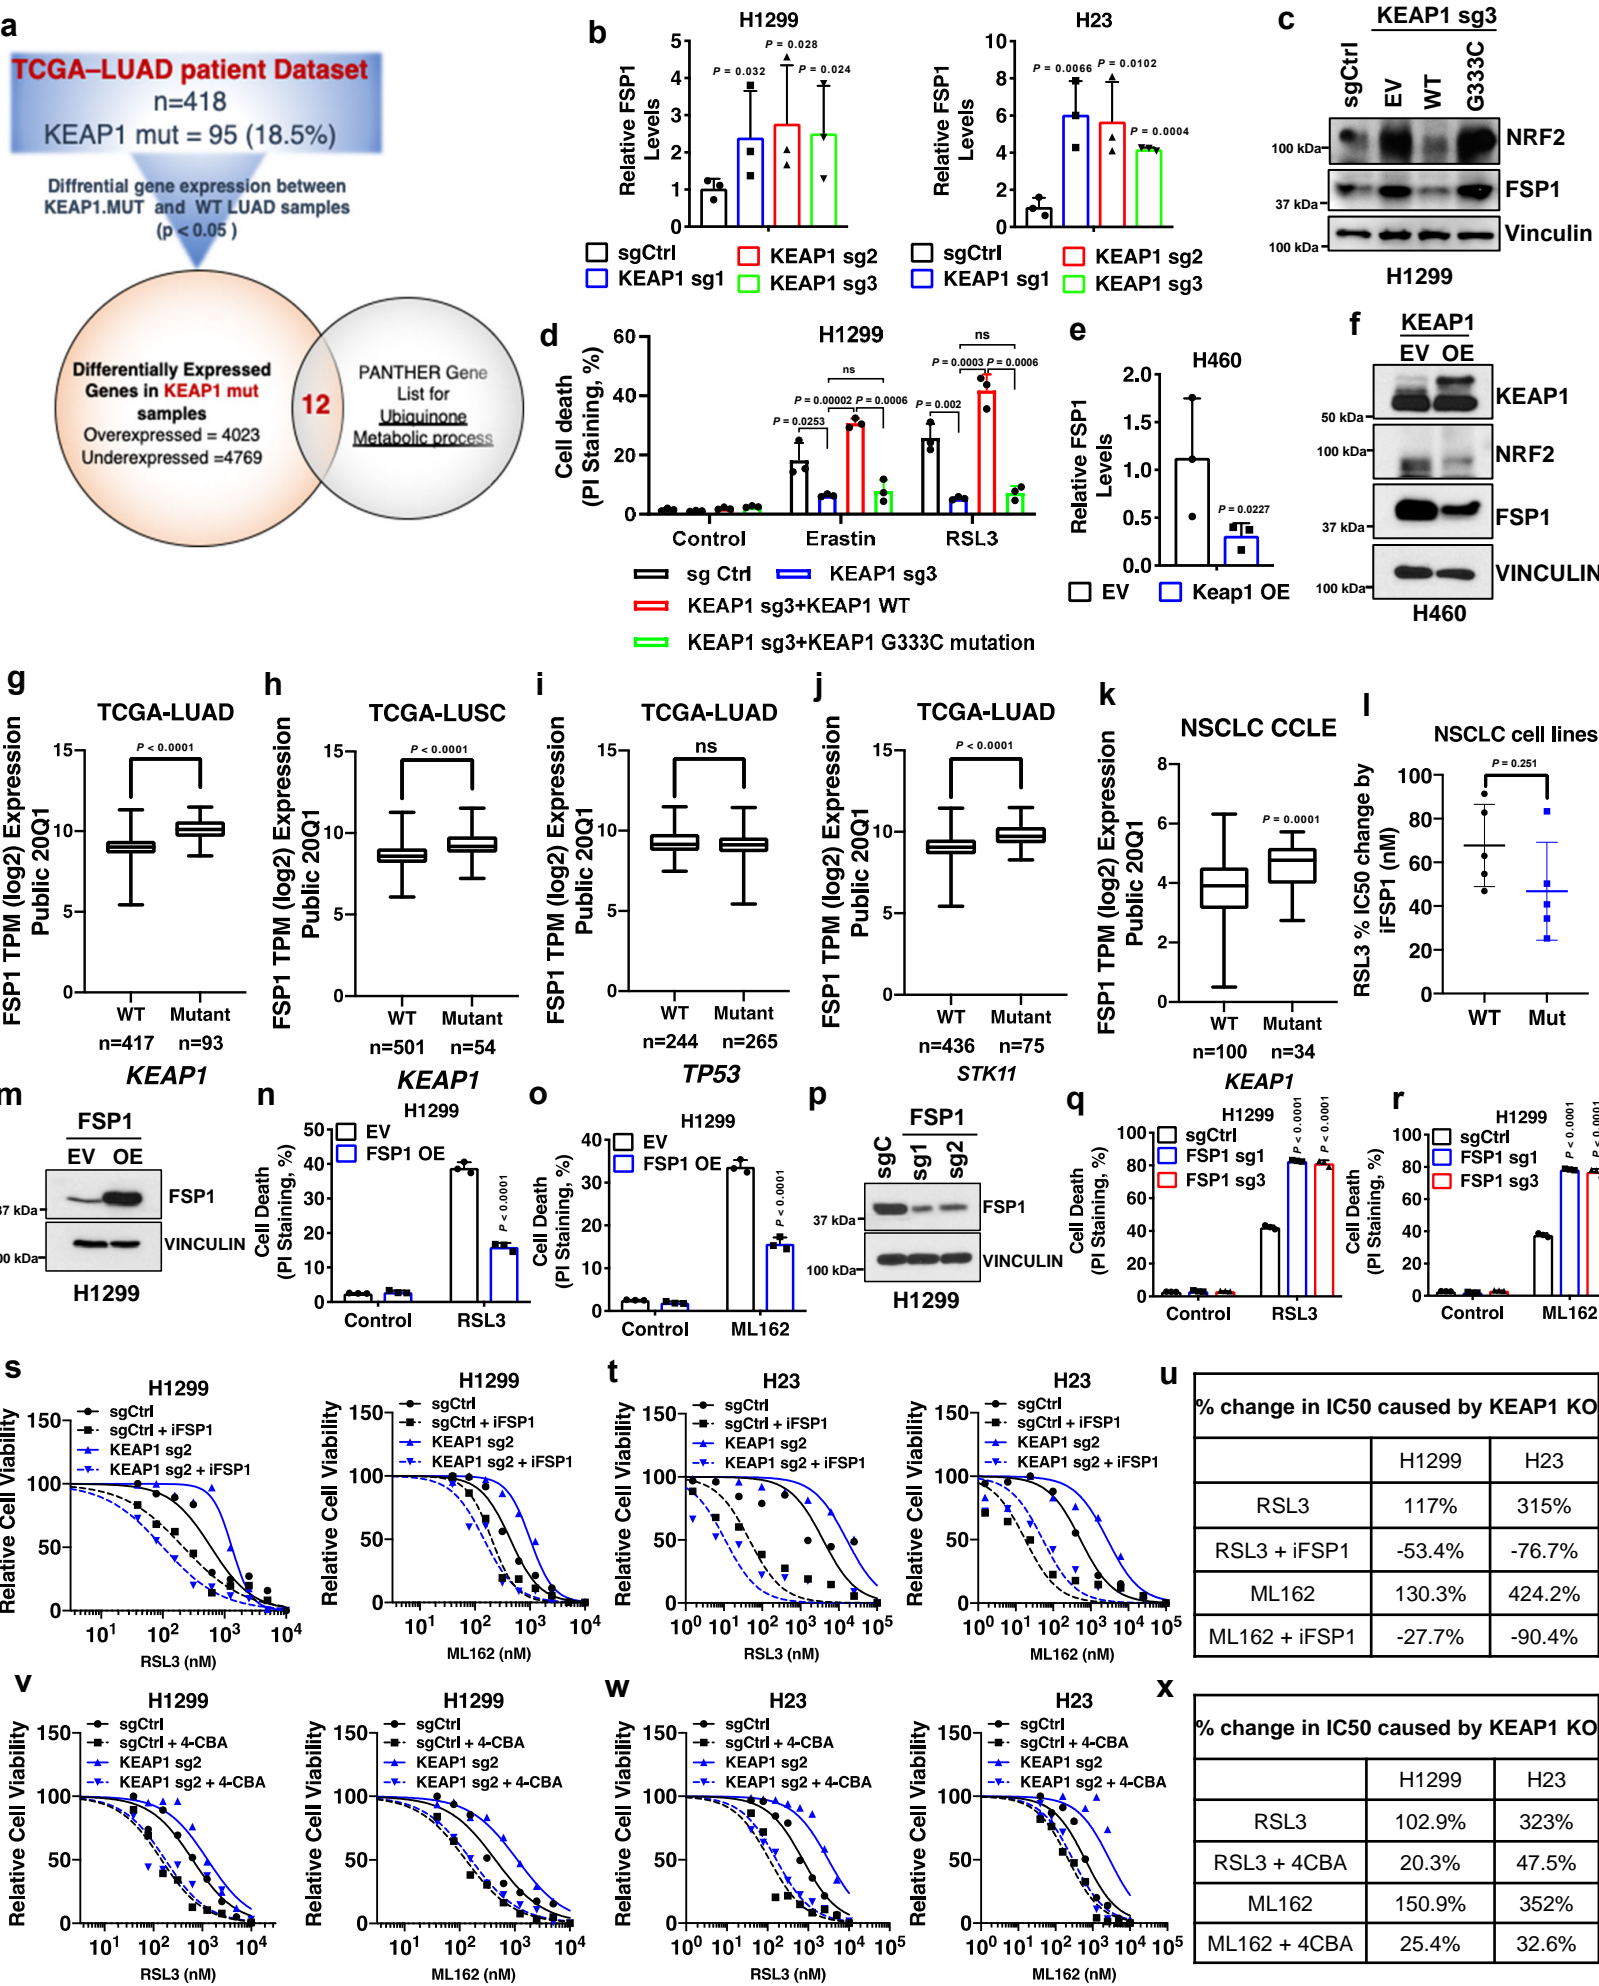

### Supplementary Figure 3. KEAP1 regulates ferroptosis sensitivity through FSP1.

**a** Schematic of gene ontology analysis on overexpressed genes in *KEAP1* mutant LUAD. **b** qRT-PCR analysis of *FSP1* in *KEAP1* KO H1299 or H23 cells. **c** Protein levels of NRF2 and FSP1 in H1299 control cells or in H1299 *KEAP1* KO cells expressing empty vector (EV), KEAP1 wild-type (WT), or KEAP1 G333C mutant. **d** Cell death analysis of indicated H1299 cells treated with erastin or RSL3. **e** qRT-PCR analysis of *FSP1* in H460 cells with KEAP1 overexpression (OE). **f** Protein levels of KEAP1, NRF2, and FSP1 in KEAP1 OE H460 cells. **g-k** Correlation analysis of FSP1 expression levels in *KEAP1* mutant TCGA-LUAD (**g**), *KEAP1* mutant TCGA-LUSC (**h**), *p53* mutant TCGA-LUAD (**i**), *LKBI* mutant TCGA-LUAD (**j**), or *KEAP1* mutant NSCLC cell lines from CCLE datasets (**k**). TCGA: The Cancer Genome Atlas. **l** Percentage changes in RSL3 IC<sub>50</sub> with iFSP1 cotreatment in NSCLC cell lines. **m** protein levels of FSP1 in H1299 cells with FSP1 OE. **n, o** Cell death analysis of H1299 cells with FSP1 OE treated with RSL3 (**n**) and ML162 (**o**). **p** Protein levels of FSP1 in *FSP1* KO H1299 cells. **q, r** Cell death analysis of *FSP1* KO H1299 cells treated with RSL3 (**q**) or ML162 (**r**). **s, t** Cell viability was quantified by CCK8 in *KEAP1* KO H1299 cells with iFSP1 treatment combined with RSL3 or ML162 (**s**); *KEAP1* KO H23 cells with iFSP1 treatment combined with RSL3 or ML162 (**t**). **u** Percentage changes in IC<sub>50</sub> caused by *KEAP1* KO in H1299 and H23 cell lines upon the indicated treatments. **v, w** Cell viability was quantified by CCK8 in *KEAP1* KO H1299 cells with 4-CBA treatment combined with RSL3 or ML162 (**v**); *KEAP1* KO H23 cells with 4-CBA treatment combined with RSL3 or ML162 (**w**). **x** Percentage changes in IC<sub>50</sub> caused by *KEAP1* KO in H1299 and H23 cell lines upon the indicated treatments. Error bars are (if mentioned otherwise) mean  $\pm$  SD;  $n = 3$ . P value was determined by two-tailed unpaired Student's t test. Box and whisker plots show centre line at median, box limits at 25th/75th centiles and whiskers  $\pm 1.5 \times$  interquartile range (IQR); ns, not significant. Source data are provided as a Source Data file.



**Supplementary Figure 4. KEAP1 regulates FSP1 through NRF2-mediated transcription.**

**a, b** NRF2 ChIP-seq profiles in lymphoblastoid, A549, IMR90, HepG2 and Hela S3 cell lines

(GEO datasets: GSE37589, GSE91894, GSE91565, GSE91809 and GSE91997). **c** Unsupervised clustering analyses

of FSP1 and NRF2 target genes in multiple cancers. **d** Correlation analyses of FSP1 and classical NRF2 target genes

in TCGA-LUAD. **e** Protein levels of FSP1 and NRF2 in H1299 cells treated with TBHQ. **f** qRT-PCR analysis of

*FSP1* in H1299 treated with TBHQ. **g** qRT-PCR analysis of *FSP1* in *KEAP1* *NRF2* DKO H1299 cells. **h** FACS

panels of PI staining from three independent repeats showing cell death upon RSL3 treatment in *KEAP1* *NRF2* DKO

H1299 cells overexpressing FSP1. For **f** and **j**, P value was determined by two-tailed unpaired Student's t test. Error

bars are (if mentioned otherwise) mean  $\pm$  SD;  $n=3$ ; ns, not significant. Source data are provided as a Source Data

file.

Supplementary Figure 5

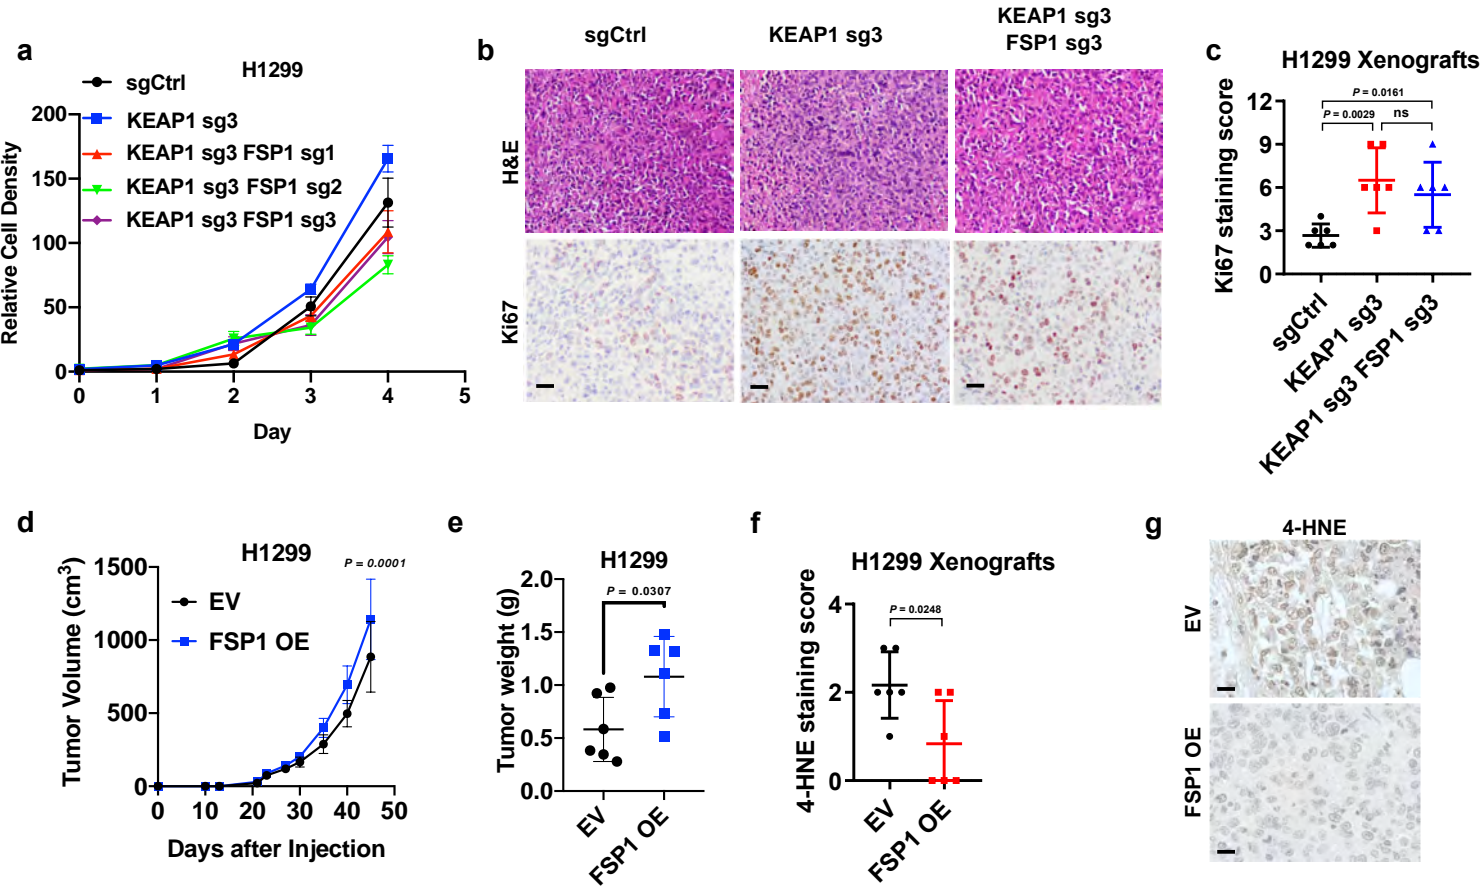

Supplementary Figure 5. FSP1 promotes tumorigenesis in lung cancer upon *KEAP1* deletion

**a** Proliferation rates of *KEAP1 FSP1* DKO H1299 cell lines. Error bars are means  $\pm$  SD,  $n = 3$ . **b** Representative images of hematoxylin and eosin and Ki67 immunohistochemical staining in *KEAP1 FSP1* DKO H1299 xenograft tumors. Scale bars, 50  $\mu$ m. **c** Immunohistochemistry scoring of Ki67 staining in *KEAP1 FSP1* DKO H1299 xenograft tumor sections. Error bars are means  $\pm$  SD,  $n = 6$  randomly selected magnification fields. **d** Tumor volumes of empty vector (EV) and FSP1-overexpressing (OE) H1299 xenograft tumors. Error bars are mean  $\pm$  SD;  $n = 6$  tumors. **e** End point weights of EV and FSP1 OE H1299 xenograft tumors. Error bars are mean  $\pm$  SD;  $n = 6$  tumors. **f, g** Immunochemistry staining scoring (**f**) and representative images (**g**; scale bars, 20  $\mu$ m) of 4-HNE in indicated H1299 xenograft tumor sections. Error bars are means  $\pm$  SD,  $n = 6$  randomly selected magnification fields. Data are presented as (if mentioned otherwise) mean  $\pm$  SD;  $n = 3$ . P value was determined by two-tailed unpaired Student's t test; ns, not significant. Source data are provided as a Source Data file.

Supplementary Figure 6

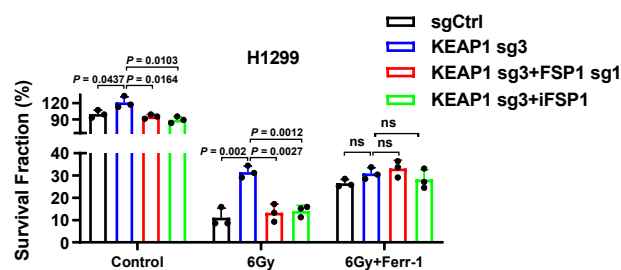

**Supplementary Figure 6. FSP1 inhibition sensitizes *KEAP1* deficient lung cancer cells to radiation through ferroptosis.**

Survival fraction of *KEAP1* KO H1299 cells with genetic or pharmacological inhibition of FSP1 treated with 6 Gy X-ray irradiation alone or with ferrostatin-1 pretreatment for 24h. Data are presented as (if mentioned otherwise) mean +/- SD;  $n = 3$ . P value was determined by two-tailed unpaired Student's t test; ns, not significant. Source data are provided as a Source Data file.

Supplementary Figure 7

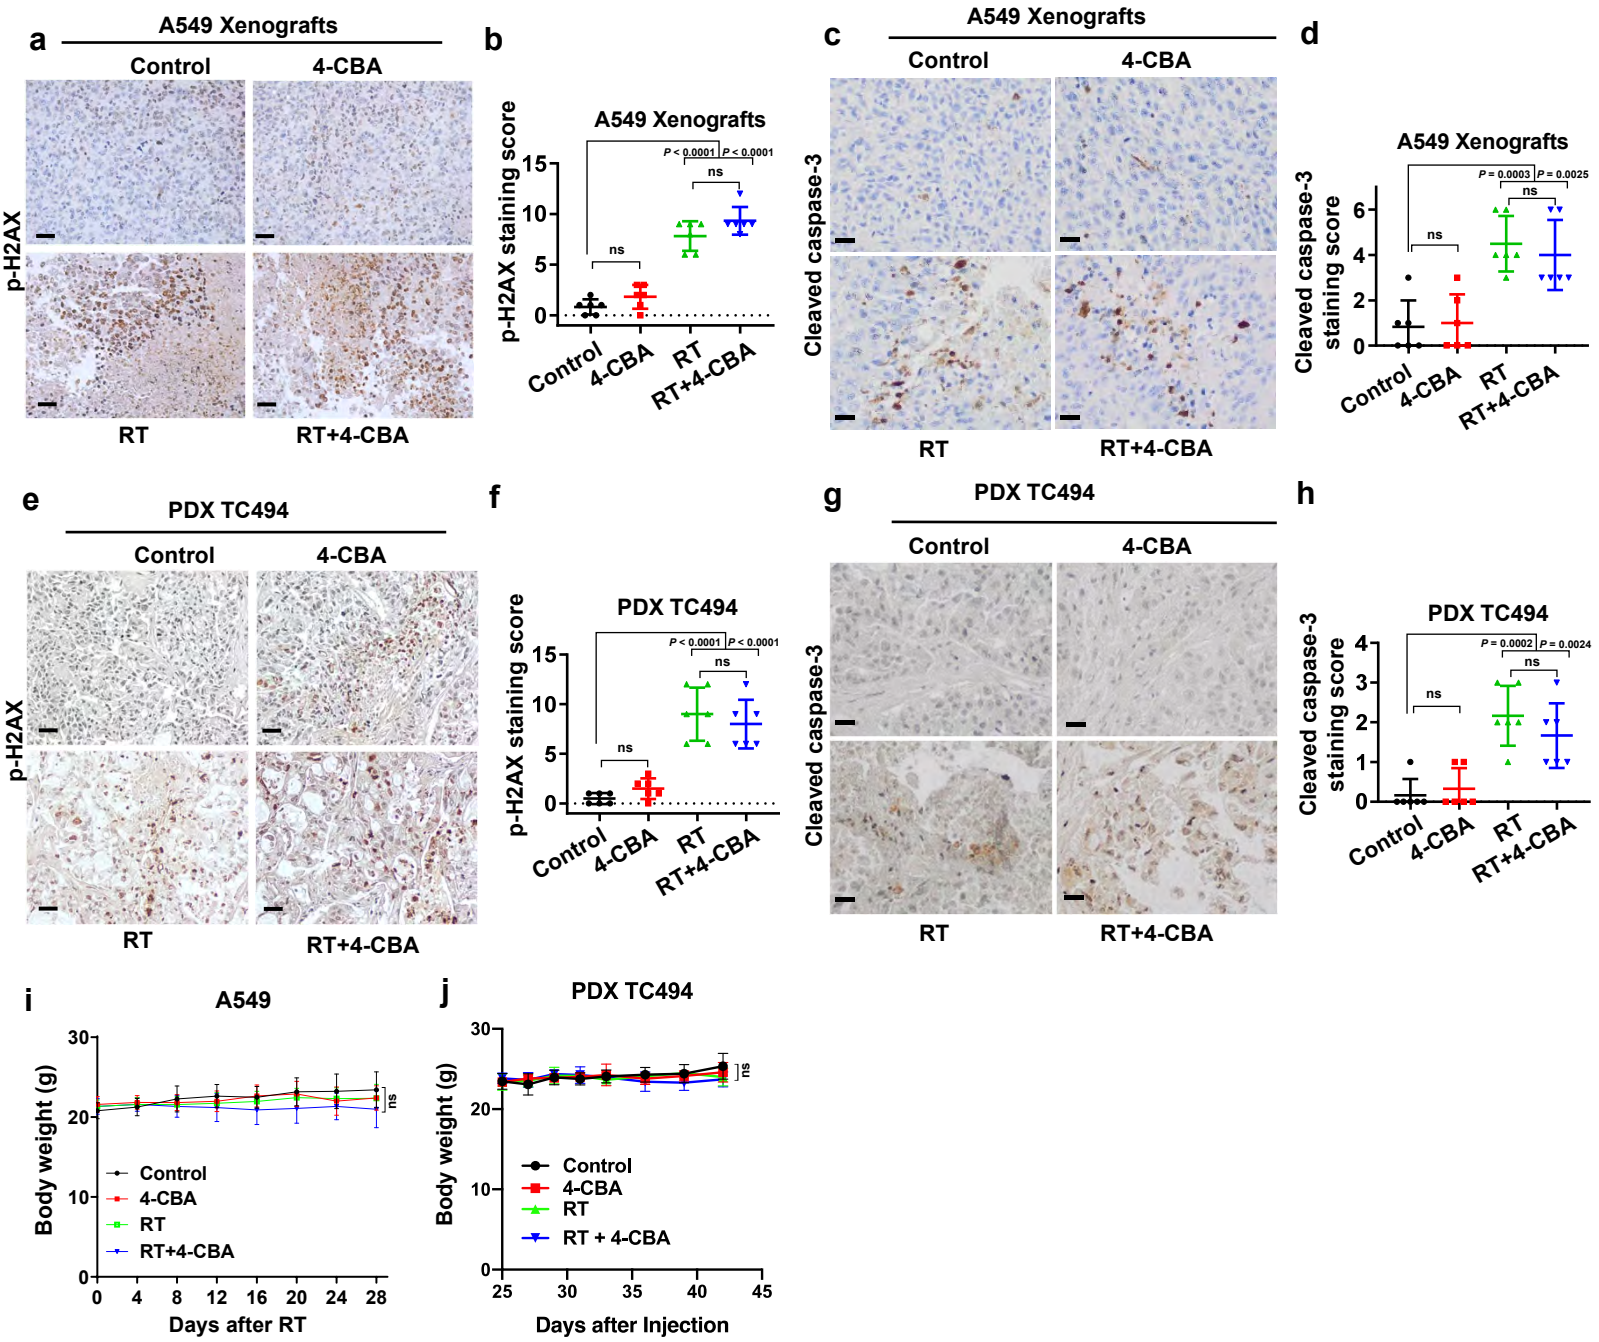

**Supplementary Figure 7. Inhibiting CoQ synthesis reverses radioresistance in *KEAPI* deficient or mutant lung cancers.**

**a, b** Representative images (**a**; scale bars, 20  $\mu$ m) and scores (**b**) of IHC staining for p-H2AX in A549 xenograft tumors with indicated treatments. Error bars are means  $\pm$  SD,  $n = 6$  randomly selected magnification fields. **c, d** Representative images (**c**; scale bars, 20  $\mu$ m) and scores (**d**) of IHC staining for cleaved caspase-3 in A549 xenograft tumors with indicated treatments. Error bars are means  $\pm$  SD,  $n = 6$  randomly selected magnification fields. **e, f** Representative images (**e**; scale bars, 20  $\mu$ m) and scores (**f**) of IHC staining for p-H2AX in PDX TC494 tumors with indicated treatments. Error bars are means  $\pm$  SD,  $n = 6$  randomly selected magnification fields. **g, h** Representative images (**g**; scale bars, 20  $\mu$ m) and scores (**h**) of IHC staining for cleaved caspase-3 in PDX TC494 tumors with indicated treatments. Error bars are means  $\pm$  SD,  $n = 6$  randomly selected magnification fields. **i, j** Mice weights of xenografts derived from A549 (**i**) or PDX TC494 tumors (**j**) grown at different time points treated with either 10 Gy X-ray irradiation or 4-CBA alone, or combined treatment of radiation and 4-CBA. Error bars are means  $\pm$  SD,  $n = 5-8$  mice. P value was determined by two-tailed unpaired Student's t test; ns, not significant. Source data are provided as a Source Data file.

Supplementary Figure 8

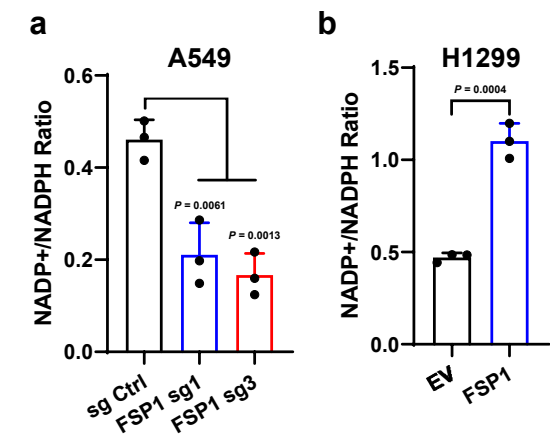

**Supplementary Figure 8. Inhibiting CoQ synthesis reverses radioresistance in *KEAP1* deficient or mutant lung cancer.**

**a, b** NADP<sup>+</sup>/NADPH ratio in A549 *FSP1* KO cells (**a**) and H1299 *FSP1* overexpressing cells (**b**). Error bars are presented as mean +/- SD; *n* =3 independent samples. P value was determined by two-tailed unpaired Student's t test. Source data are provided as a Source Data file.

**Supplementary Figure 9**

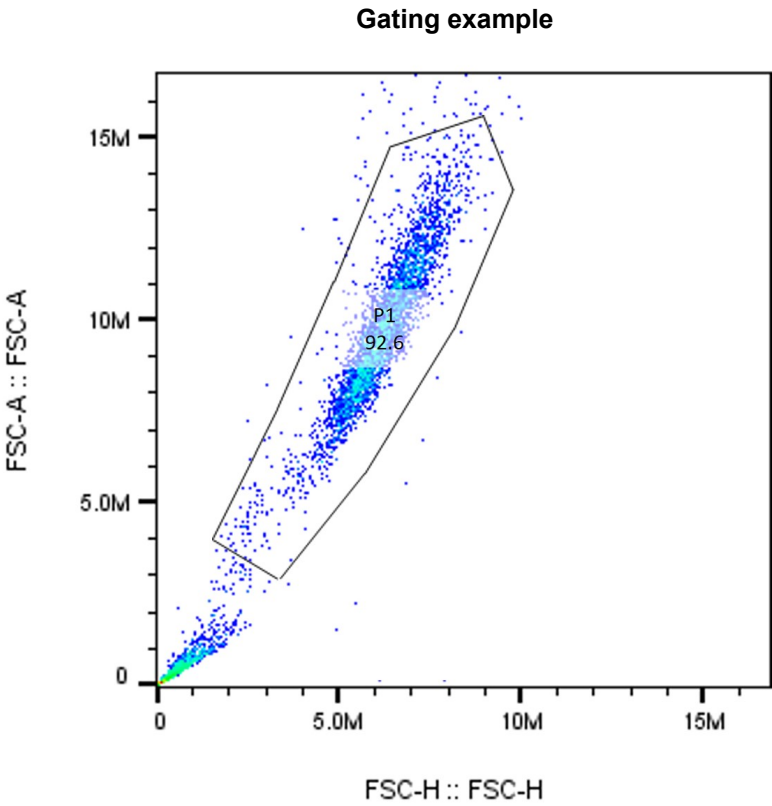

**Supplementary Figure 9. Gating strategies for lipid peroxidation analysis through flow cytometry.**

**Supplementary Table 1. Ubiquinone metabolic pathway enrichment**

| Ubiquinone metabolic pathway enrichment |            |            |
|-----------------------------------------|------------|------------|
|                                         | log2FC     | p value    |
| COQ6                                    | 0.313      | 0.00000162 |
| COQ3                                    | 0.4504     | 1.77E-09   |
| COQ5                                    | 0.18560449 | 0.00320091 |
| PDSS1                                   | 0.38256335 | 0.0000134  |
| COQ9                                    | 0.34665797 | 4.23E-08   |
| FSP1                                    | 1.12606245 | 1.70E-38   |
| COQ2                                    | 0.17774408 | 0.00394329 |
| NDUFA9                                  | 0.40682899 | 1.13E-08   |
| COQ4                                    | 0.17424572 | 0.00921812 |
| COQ10B                                  | 0.20002756 | 0.0000697  |
| FDXR                                    | 0.18537058 | 0.04554662 |
| COQ7                                    | 0.14756895 | 0.00784763 |

**Supplementary Table 2. Oligos sequences and quantitative reverse transcription PCR primer sequences**

| Oligos sequences                                        |                              |
|---------------------------------------------------------|------------------------------|
| Control-sgRNA-F                                         | CACCGGCACTACCAGAGCTAACTCA    |
| Control-sgRNA-R                                         | AAACTGAGTTAGCTCTGGTAGTGCC    |
| KEAP1-sgRNA#1-F                                         | CACCGCTTGTGGGCCATGAACTGGG    |
| KEAP1-sgRNA#1-R                                         | AAACCCCAGTTCATGGCCCAACAAGC   |
| KEAP1-sgRNA#2-F                                         | CACCGTGTGTCCTCCACGTCATGAA    |
| KEAP1-sgRNA#2-R                                         | AAAC TTCATGACGTGGAGGACACAC   |
| KEAP1-sgRNA#3-F                                         | CACCGGAGGACACACTTCTCGCCCA    |
| KEAP1-sgRNA#3-R                                         | AAAC TGGGCGAGAAGTGTGTCCTCC   |
| NRF2-sgRNA#3-F                                          | CACCGTTACAACTAGATGAAGAGAC    |
| NRF2-sgRNA#3-R                                          | AAACGTCTCTTCATCTAGTTGTAAC    |
| NRF2-sgRNA#4-F                                          | CACCGCAGATCCACTGGTTTCTGAC    |
| NRF2-sgRNA#4-R                                          | AAACGTCAGAAACCACTGGATCTGC    |
| SLC7A11-sgRNA#2-F                                       | CACCGATGAGCTTGATCGCAAGTTC    |
| SLC7A11-sgRNA#2-R                                       | AAACGAACTTGCGATCAAGCTCATC    |
| SLC7A11-sgRNA#3-F                                       | CACCGAAGTATTACGCGTTGCCAC     |
| SLC7A11-sgRNA#3-R                                       | AAACGTGGCAACCGCGTAATACTTC    |
| GPX4-sgRNA-F                                            | CACCGGGTGAAGCGCTACGGACCCA    |
| GPX4-sgRNA-R                                            | AAACTGGGTCCGTAGCGCTTCACCC    |
| FSP1-sgRNA-F#1-F                                        | CACCGCCACGATGAACCGTGAGCGC    |
| FSP1-sgRNA-R#1-R                                        | AAACGCGCTCACGGTTCATCGTGGC    |
| FSP1-sgRNA-F#3-F                                        | CACCGCATCTTGGGCGTCTCACGT     |
| FSP1-sgRNA-R#3-R                                        | AAACACGTGAGGACGCCCAAGATGC    |
| COQ2-sgRNA-F                                            | CACCGATGCTGGGCTCGCGAGCCGC    |
| COQ2-sgRNA-R                                            | AAACGCGGCTCGCGAGCCCAGCATC    |
| KEAP1-sgRNA#3-mutation1F                                | CCTACACGGCCTCCATCTCGATGGGCGA |
| KEAP1-sgRNA#3-mutation1R                                | TCGCCCATCGAGATGGAGGCCGTGTAGG |
| KEAP1-sgRNA#3-mutation2F                                | ATGGGCGAAAAGTGTGTCCTCCACGTC  |
| KEAP1-sgRNA#3-mutation2R                                | GACGTGGAGGACACACTTTTCGCCCAT  |
| KEAP1 G333C-mutant 1F                                   | TACACCGCGGGCTGCTACTTCCGACAGT |
| KEAP1 G333C-mutant 1R                                   | ACTGTGCGAAGTAGCAGCCCGCGGTGTA |
| Quantitative Reverse Transcription PCR primer sequences |                              |
| SLC7A11-F                                               | ATGCAGTGGCAGTGACCTTT         |
| SLC7A11-R                                               | GGCAACAAAGATCGGAACTG         |
| GPX4-F                                                  | ACAAGAACGGCTGCGTGGTGAA       |
| GPX4-R                                                  | GCCACACACTTGTGGAGCTAGA       |
| FSP1-F                                                  | GAATCCCAGTGTGTGAGCGA         |
| FSP1-R                                                  | GATGCACACCCCTGTGTCAA         |
| NRF2-F                                                  | CAGCGACGGAAAGAGTATGA         |
| NRF2-R                                                  | TGGGCAACCTGGGAGTAG           |
| PTGS2-F                                                 | CTGATGATTGCCCCACTCCC         |
| PTGS2-R                                                 | TCGTAGTCGAGGTCATAGTTC        |
| Actin-F                                                 | CGGAACCGCTCATTGCC            |
| Actin-R                                                 | ACCCACACTGTGCCCATCTA         |
